# Supplementary material for: Textile energy storage in perspective
Source: Royal Society of Chemistry journal article supplement (doi:10.1039/c4ta00203b), 2014-01-01
Supplement: c4ta00203b1.pdf [file c4ta00203b1.pdf]

## Electronic Supplementary Information (ESI)

# Textile Energy Storage in Perspective

Kristy Jost,<sup>a,b</sup> Genevieve Dion<sup>a</sup> and Yury Gogotsi<sup>b</sup>

<sup>a</sup> A.J. Drexel Nanomaterials Institute, and the Materials Science and Engineering Department, Drexel University, Philadelphia, PA, USA

<sup>b</sup> Shima Seiki Haute Technology Laboratory at the ExCITE Center, Antoinette Westphal College of Media Arts and Design, Drexel University, Philadelphia, PA, USA

### Calculations for Tables 1-2

The data reported in tables 1 and 2 represents results for samples with the highest reported mass loading (which as evidenced by **Figure 8**, results in higher capacitance per area) tested as close to 10 mV/s as possible, or the next closest scan rate. If not reported, capacitance per area (per electrode) was found by multiplying the gravimetric capacitance by the mass per electrode, then dividing by 2 for a symmetric device (**Eq. 1-2**). If gravimetric capacitance and capacitance per area were reported but not mass loading, we can divide the device capacitance per area by the gravimetric capacitance per electrode, and further divide by 2, (**Eq. 3**). Lastly, the energy of the device per area can be calculated and converted to capacity per area (mAh/cm<sup>2</sup>) by multiplying the capacitance by 1/2 times the voltage, and times 3.6 and divide by the given area (**Eq. 4**).

$$\frac{F}{g} \cdot \frac{g}{cm^2} = \frac{F}{cm^2} = C_{Electrode} = \text{electrode capacitance} \quad (1)$$

$$\frac{1}{C_{electrode}} + \frac{1}{C_{electrode}} = \frac{1}{C_{device}} \quad (\text{symmetric cell only}), \quad \frac{C_{electrode}}{2} = C_{device} = \text{device capacitance} \quad (2)$$

$$\frac{\left[ \frac{C_{device}}{cm^2} \div \frac{C_{electrode}}{g} \right]}{2} = \frac{g}{cm^2} = \text{mass of one electrode per } cm^2 \quad (3)$$

$$E = \frac{1}{2} C_{device} V^2 = \frac{1As}{2V} V^2, \quad \frac{mAh}{cm^2} = \frac{1As}{2V} V \cdot \frac{3600 \frac{s}{h}}{1000 \frac{mA}{A}} \div cm^2 = \text{capacity per } cm^2 \quad (4)$$

### Equations to determine capacitance from experiments:

$$Q = CV \quad (5)$$

$$C_{CV} = \left( \frac{dQ}{dt} \right) / \left( \frac{dV}{dt} \right) \quad (6)$$

Where C is capacitance (Farads), V is the voltage, and Q is the stored charge. C<sub>CV</sub> is the capacitance from a cyclic voltammogram, dQ/dt is the charge accumulated in time, and dV/dt is the sweep rate across the voltage window. Q can be determined by integrating the area under the CV curve.

$$C_{GC} = \frac{i}{\frac{dV}{dt}} \quad (7)$$

For galvanostatic cycling, *i* is the applied current (e.g., 10 mA) and dV/dt is the change in voltage over time as the capacitor charges, as well as the slope of the discharge curve.

$$ESR_{GC} = \frac{\Delta V}{i} \quad (8)$$

Where ΔV is the voltage drop as the capacitor switches from charging to discharging, and *i* is again the applied current.

The ESR from an EIS plot is typically taken from the real impedance (of a nyquist plot) where the curve intersects the X-axis, or the real impedance at 1 kHz.

**Table 1.** Full Fabric Supercapacitors and batteries from literature and their respective materials, active mass loadings per electrode and device capacitance or capacity per area. CF=carbon fiber, CFF=carbon fiber fabric, NW = nano wires, AC = activated carbon

| Device Materials                                                                      | Fabric               | Electrolyte                                                      | Mass of active material per electrode area (mg/cm <sup>2</sup> ) | Device Capacitance per area (mF/cm <sup>2</sup> ) | Device Capacity per area (mAh/cm <sup>2</sup> ) | Refs. |
|---------------------------------------------------------------------------------------|----------------------|------------------------------------------------------------------|------------------------------------------------------------------|---------------------------------------------------|-------------------------------------------------|-------|
| AC                                                                                    | Cotton and polyester | 1M Na <sub>2</sub> SO <sub>4</sub>                               | 4.00                                                             | 240.00                                            | 0.43                                            | 1     |
| AC (from cellulose)                                                                   | Knitted cotton       | 1M Na <sub>2</sub> SO <sub>4</sub>                               | 5.00                                                             | 127.00                                            | 0.235                                           | 2     |
| AC                                                                                    | Knitted CFF          | PVA-H <sub>3</sub> PO <sub>4</sub> -SiWA                         | 12.00                                                            | 510.00                                            | 0.73                                            | 3     |
| SWCNTs                                                                                | Knitted cotton       | 1M LiPF <sub>6</sub>                                             | 8.00                                                             | 480.00                                            | 2.59                                            | 4     |
| SWCNTs                                                                                | Nonwoven cotton      | Li <sub>2</sub> SO <sub>4</sub> /Na <sub>2</sub> SO <sub>4</sub> | 0.47                                                             | 16.40                                             | 0.0025                                          | 5     |
| Graphene paint                                                                        | Woven cotton         | 1M KOH                                                           | 1.08                                                             | 43.50                                             | 0.08                                            | 6     |
| Graphene                                                                              | Ni-coated nylon mesh | 1M Na <sub>2</sub> SO <sub>4</sub>                               | 0.25                                                             | 44.70                                             | 0.055                                           | 7     |
| SWCNTs + MnO <sub>2</sub>                                                             | Knitted cotton       | 2M Li <sub>2</sub> SO <sub>4</sub>                               | 0.24 CNTs, 1.6 MnO <sub>2</sub>                                  | 276.00                                            | 0.4                                             | 4     |
| Graphene + MnO <sub>2</sub>                                                           | Nonwoven polyester   | 0.5 M Na <sub>2</sub> SO <sub>4</sub>                            | 1.25 MnO <sub>2</sub>                                            | 275.00                                            | 0.4                                             | 8     |
| Graphene/CNT/Fe <sub>3</sub> O <sub>4</sub>                                           | --                   | 1M Na <sub>2</sub> SO <sub>4</sub>                               | 0.00                                                             | 0.98                                              | 0.015                                           | 9     |
| Zn <sub>2</sub> SnO <sub>4</sub> /MnO <sub>2</sub>                                    | CFF                  | 1M Na <sub>2</sub> SO <sub>4</sub>                               | 0.90                                                             | 288.00                                            | 0.415                                           | 10    |
| MnO <sub>2</sub>                                                                      | AC                   | 1M Na <sub>2</sub> SO <sub>4</sub>                               | +2.4 MnO <sub>2</sub>                                            | 292.00                                            | 0.5                                             | 2     |
| WO <sub>3-x</sub> @Au@MnO <sub>2</sub> core-shell nanowires                           | CFF                  | 0.1 M Na <sub>2</sub> SO <sub>4</sub>                            | 0.31 MnO <sub>2</sub>                                            | 57.00                                             | 0.08                                            | 11    |
| MnO <sub>2</sub> /carbon                                                              | ZnO NW               | PVA-LiCl                                                         | 0.11 MnO <sub>2</sub>                                            | 26.00                                             | 0.035                                           | 12    |
| (MnO <sub>2</sub> ) - zinc (Zn)                                                       | Ag-coated knit       | PVA-6 M KOH and 0.4 M ZnO                                        | 16-18                                                            | 1.08                                              | 1.94                                            | 13    |
| LiFePO <sub>4</sub> cathode and Li <sub>4</sub> Ti <sub>5</sub> O <sub>10</sub> anode | Nonwoven polyester   | 1M LiPF <sub>6</sub>                                             | 168.00                                                           | 2030.00                                           | 27.00                                           | 14    |
| LiFePO <sub>4</sub> cathode and Li <sub>4</sub> Ti <sub>5</sub> O <sub>10</sub> anode | n/a                  | PVA-LiPF <sub>6</sub>                                            | n/a                                                              | n/a                                               | n/a                                             | 15    |

**Table 2.** Fiber and Yarn supercapacitors and batteries from literature, including their active materials, active mass loading per electrode and device capacitance or capacity per length. CF=carbon fiber, CFF=carbon fiber fabric, NW=nano wires, StS=stainless steel, PANi = polyaniline

| Device Materials             | Base yarn              | Electrolyte                                                           | (mg/cm) | Device Capacitance per length (mF/cm) | Device Capacity per length (mAh/cm) | Refs. |
|------------------------------|------------------------|-----------------------------------------------------------------------|---------|---------------------------------------|-------------------------------------|-------|
| Copper wire, "metal" sheets  | Cu wire                | n/a                                                                   | n/a     | 0.000001                              | --                                  | 16    |
| Graphitic pen ink            | "Plastic fiber"        | Na <sub>2</sub> SO <sub>4</sub> or PVA-H <sub>3</sub> PO <sub>4</sub> | n/a     | 0.5                                   | 0.001                               | 17    |
| Spun graphene nanoribbon     | --                     | PVA-H <sub>3</sub> PO <sub>4</sub>                                    | n/a     | 0.5                                   | 0.001                               | 18    |
| Electrolyzed graphene        | Graphene               | PVA-H <sub>3</sub> PO <sub>4</sub>                                    | n/a     | 0.019                                 | 0.0005                              | 19    |
| Biscrolled PEDOT:PSS         | CNTs – Stainless steel | PVA-H <sub>3</sub> PO <sub>4</sub>                                    | 0.0057  | 0.5                                   | 0.001                               | 20    |
| Airbrushed CNTs              | CF                     | PVA-H <sub>3</sub> PO <sub>4</sub>                                    | 0.4     | 6.3                                   | 0.012                               | 21    |
| KnO NW with MnO <sub>2</sub> | Kevlar                 | PVA-H <sub>3</sub> PO <sub>4</sub>                                    | n/a     | 0.021                                 | 0.0005                              | 22    |
| MnO <sub>2</sub>             | CF                     | PVA-H <sub>3</sub> PO <sub>4</sub>                                    | n/a     | 0.0025                                | --                                  | 23    |
| PANi NW                      | CNT                    | PVA-H <sub>3</sub> PO <sub>4</sub>                                    | n/a     | 1.79                                  | 0.003                               | 24    |
| PANi-StS                     | Pt-StS                 | 0.6 M 1-butyl-3-methylimidazolium                                     | n/a     | 20                                    | 0.036                               | 25    |
| Ni-Sn                        | Cu wire                | LiCoO <sub>2</sub>                                                    | n/a     | 51.3                                  | 0.37                                | 26    |

#### References:

1. K. Jost, C. R. Perez, J. K. McDonough, V. Presser, M. Heon, G. Dion and Y. Gogotsi, *Energy and Environmental Science*, 2011, **4**, 5060-5067.
2. L. Bao and X. Li, *Adv Mater*, 2012, **24**, 3246-3252.
3. K. Jost, D. Stenger, C. R. Perez, J. K. McDonough, K. Lian, Y. Gogotsi and G. Dion, *Energ Environ Sci*, 2013, **6**, 2698–2705.
4. L. B. Hu, M. Pasta, F. La Mantia, L. F. Cui, S. Jeong, H. D. Deshazer, J. W. Choi, S. M. Han and Y. Cui, *Nano Lett*, 2010, **10**, 708-714.
5. M. Pasta, F. La Mantia, L. B. Hu, H. D. Deshazer and Y. Cui, *Nano Research*, 2010, **3**, 452-458.
6. W.-w. Liu, X.-b. Yan, J.-w. Lang, C. Peng and Q.-j. Xue, *Journal of Materials Chemistry*, 2012, **22**, 17245-17253.
7. X. Li, X. Zang, Z. Li, X. Li, P. Li, P. Sun, X. Lee, R. Zhang, Z. Huang and K. Wang, *Advanced Functional Materials*, 2013, 4862–4869.
8. G. H. Yu, L. B. Hu, M. Vosgueritchian, H. L. Wang, X. Xie, J. R. McDonough, X. Cui, Y. Cui and Z. N. Bao, *Nano Lett*, 2011, **11**, 2905-2911.
9. H. H. Cheng, Z. L. Dong, C. G. Hu, Y. Zhao, Y. Hu, L. T. Qu, N. Chena and L. M. Dai, *Nanoscale*, 2013, **5**, 3428-3434.
10. L. H. Bao, J. F. Zang and X. D. Li, *Nano Lett*, 2011, **11**, 1215-1220.
11. X. H. Lu, T. Zhai, X. H. Zhang, Y. Q. Shen, L. Y. Yuan, B. Hu, L. Gong, J. Chen, Y. H. Gao, J. Zhou, Y. X. Tong and Z. L. Wang, *Adv Mater*, 2012, **24**, 938-944.
12. P. Yang, X. Xiao, Y. Li, Y. Ding, P. Qiang, X. Tan, W. Mai, Z. Lin, W. Wu, T. Li, H. Jin, P. Liu, J. Zhou, C. P. Wong and Z. L. Wang, *ACS nano*, 2013, **7**, 2617-2626.
13. A. M. Gaikwad, A. M. Zamarayeva, J. Rousseau, H. Chu, I. Derin and D. A. Steingart, *Adv Mater*, 2012, 10.1002/adma.201201329.
14. L. B. Hu, F. La Mantia, H. Wu, X. Xie, J. McDonough, M. Pasta and Y. Cui, *Adv Energy Mater*, 2011, **1**, 1012-1017.
15. Y. Liu, S. Gorgutsa, C. Santato and M. Skorobogatiy, *Journal of The Electrochemical Society*, 2012, **159**, A349-A356.
16. S. Gorgutsa, J. F. Gu and M. Skorobogatiy, *Smart Materials and Structures*, 2012, **21**, 015010.
17. Y. Fu, X. Cai, H. Wu, Z. Lv, S. Hou, M. Peng, X. Yu and D. Zou, *Adv Mater*, 2012, **24**, 5713-5718.
18. J. Carretero-González, E. Castillo-Martínez, M. Dias-Lima, M. Acik, D. M. Rogers, J. Sovich, C. S. Haines, X. Lepró, M. Kozlov, A. Zhakidov, Y. Chabal and R. H. Baughman, *Adv Mater*, 2012, 5695-5701.
19. Y. Meng, Y. Zhao, C. Hu, H. Cheng, Y. Hu, Z. Zhang, G. Shi and L. Qu, *Adv Mater*, 2013, 2326–2331.
20. J. A. Lee, M. K. Shin, S. H. Kim, H. U. Cho, G. M. Spinks, G. G. Wallace, M. D. Lima, X. Lepro, M. E. Kozlov, R. H. Baughman and S. J. Kim, *Nat Commun*, 2013, **4**, 1970.
21. V. T. Le, H. Kim, A. Ghosh, J. Kim, J. Chang, Q. A. Vu, D. T. Pham, J.-H. Lee, S.-W. Kim and Y. H. Lee, *ACS nano*, 2013.

22. J. Bae, M. K. Song, Y. J. Park, J. M. Kim, M. L. Liu and Z. L. Wang, *Angewandte Chemie-International Edition*, 2011, **50**, 1683-1687.
23. X. Xiao, T. Li, P. Yang, Y. Gao, H. Jin, W. Ni, W. Zhan, X. Zhang, Y. Cao and J. Zhong, *ACS nano*, 2012, **6**, 9200-9206.
24. K. Wang, Q. Meng, Y. Zhang, Z. Wei and M. Miao, *Adv Mater*, 2013.
25. Y. P. Fu, H. W. Wu, S. Y. Ye, X. Cai, X. Yu, S. C. Hou, H. Kafafy and D. C. Zou, *Energ Environ Sci*, 2013, **6**, 805-812.
26. Y. H. Kwon, S.-W. Woo, H.-R. Jung, H. K. Yu, K. Kim, B. H. Oh, S. Ahn, S.-Y. Lee, S.-W. Song, J. Cho, H.-C. Shin and J. Y. Kim, *Adv Mater*, 2012, **24**, 5192-5197.
